# Supplementary material for: Patient-Level Exposure to Actionable Pharmacogenomic Medications in a Nationally Representative Insurance Claims Database
Source: MDPI journal article supplement (doi:10.3390/jpm13111574), 2023-11-03
Supplement: s1 [file s1]

Table S1. Number (%) of incident users and average proportion of days covered (PDC) for CPIC Level A, A/B and B medications, stratified by CPIC level <sup>a, b</sup>

| CPIC Level A (N=487,800)      |              |          | CPIC Level A/B (N=21,059) |              |          | CPIC Level B (N=258,994)  |              |          |
|-------------------------------|--------------|----------|---------------------------|--------------|----------|---------------------------|--------------|----------|
| Medication (Primary Gene)     | N (%)        | Mean PDC | Medication (Primary Gene) | N (%)        | Mean PDC | Medication (Primary Gene) | N (%)        | Mean PDC |
| Ivacaftor (CFTR)              | 5 (<0.01)    | 0.893    | Tetrabenazine (CYP2D6)    | 10 (<0.01)   | 0.621    | Mycophenolic Acid (HPRT1) | 908 (0.1)    | 0.564    |
| Tamoxifen (CYP2D6)            | 1,424 (0.1)  | 0.666    | Venlafaxine (CYP2D6)      | 13,312 (1.3) | 0.458    | Sertraline (CYP2C19)      | 27,932 (2.7) | 0.436    |
| Clopidogrel (CYP2C19)         | 7,826 (0.8)  | 0.645    | Hydralazine (NAT2)        | 2,979 (0.3)  | 0.456    | Methadone (CYP2B6)        | 759 (0.1)    | 0.434    |
| Efavirenz (CYP2B6)            | 151 (<0.01)  | 0.638    | Vortioxetine (CYP2D6)     | 772 (0.1)    | 0.421    | Dexlansoprazole (CYP2C19) | 3,155 (0.3)  | 0.422    |
| Abacavir (HLA-B)              | 82 (<0.01)   | 0.634    | Divalproex Sodium (POLG)  | 4,405 (0.4)  | 0.383    | Aripiprazole (CYP2D6)     | 4,891 (0.5)  | 0.404    |
| Atorvastatin (SLCO1B1)        | 56,599 (5.5) | 0.615    | Valproic Acid (POLG)      | 176 (<0.01)  | 0.287    | Fluvoxamine (CYP2D6)      | 599 (0.1)    | 0.400    |
| Tacrolimus (CYP3A5)           | 480 (<0.01)  | 0.594    | Pimozide (CYP2D6)         | 9 (<0.01)    | 0.264    | Risperidone (CYP2D6)      | 3,137 (0.3)  | 0.364    |
| Pravastatin (SLCO1B1)         | 16,827 (1.6) | 0.562    |                           |              |          | Clomipramine (CYP2C19)    | 1,154 (0.11) | 0.348    |
| Rosuvastatin (SLCO1B1)        | 10,382 (1.0) | 0.553    |                           |              |          | Trimipramine (CYP2D6)     | 927 (0.09)   | 0.329    |
| Simvastatin (SLCO1B1)         | 24,182 (2.3) | 0.552    |                           |              |          | Dapsone (G6PD)            | 775 (0.07)   | 0.325    |
| Lovastatin (SLCO1B1)          | 3,984 (0.4)  | 0.550    |                           |              |          | Imipramine (CYP2C19)      | 611 (0.06)   | 0.320    |
| Allopurinol (HLA-B)           | 7,088 (0.7)  | 0.547    |                           |              |          | Desipramine (CYP2D6)      | 553 (0.05)   | 0.279    |
| Mercaptopurine (TPMT)         | 239 (<0.01)  | 0.538    |                           |              |          | Doxepin (CYP2C19)         | 292 (0.03)   | 0.263    |
| Fluvastatin (SLCO1B1)         | 205 (<0.01)  | 0.522    |                           |              |          | Primaquine (G6PD)         | 292 (0.03)   | 0.065    |
| Atazanavir (UGT1A1)           | 63 (<0.01)   | 0.516    |                           |              |          | Methylene Blue (G6PD)     | 267 (0.03)   | 0.046    |
| Azathioprine (NUDT15)         | 960 (0.1)    | 0.514    |                           |              |          | Hydrocodone (CYP2D6)      | 38 (<0.01)   | 0.039    |
| Pitavastatin (SLCO1B1)        | 755 (0.1)    | 0.474    |                           |              |          | Nitrofurantoin (G6PD)     | 4 (<0.01)    | 0.033    |
| Escitalopram (CYP2C19)        | 21,992 (2.1) | 0.454    |                           |              |          | Moxifloxacin (G6PD)       | 0 (0)        | --       |
| Citalopram (CYP2C19)          | 23,057 (2.2) | 0.437    |                           |              |          | Nalidixic Acid (G6PD)     | 0 (0)        | --       |
| Warfarin (VKORC1)             | 7,969 (0.8)  | 0.437    |                           |              |          | Norfloxacin (G6PD)        | 0 (0)        | --       |
| Paroxetine (CYP2D6)           | 9,078 (0.9)  | 0.406    |                           |              |          | Sodium Nitrate (G6PD)     | 0 (0)        | --       |
| Phenytoin (CYP2C9)            | 705 (0.1)    | 0.397    |                           |              |          | Sulfadiazine (G6PD)       | 0 (0)        | --       |
| Peginterferon Alfa-2A (IFNL3) | 197 (<0.01)  | 0.392    |                           |              |          |                           |              |          |

| CPIC Level A (N=487,800)      |                       |              | CPIC Level A/B (N=21,059) | CPIC Level B (N=258,994) |
|-------------------------------|-----------------------|--------------|---------------------------|--------------------------|
| Oxcarbazepine (HLA-B)         | 1,834 (0.2)           | 0.378        |                           |                          |
| Pantoprazole (CYP2C19)        | 28,652 (2.8)          | 0.364        |                           |                          |
| Peginterferon Alfa-2B (IFNL3) | 63 (<0.01)            | 0.359        |                           |                          |
| Omeprazole (CYP2C19)          | 70,496 (6.8)          | 0.347        |                           |                          |
| Carbamazepine (HLA-B)         | 1,590 (0.2)           | 0.347        |                           |                          |
| Amitriptyline (CYP2C19)       | 13,143 (1.3)          | 0.320        |                           |                          |
| Capecitabine (DPYD)           | 417 (<0.01)           | 0.311        |                           |                          |
| Nortriptyline (CYP2D6)        | 5,508 (0.5)           | 0.306        |                           |                          |
| Atomoxetine (CYP2D6)          | 1,608 (0.2)           | 0.297        |                           |                          |
| Lansoprazole (CYP2C19)        | 7,597 (0.7)           | 0.290        |                           |                          |
| Voriconazole (CYP2C19)        | 157 (<0.01)           | 0.256        |                           |                          |
| Celecoxib (CYP2C9)            | 10,061 (1.0)          | 0.251        |                           |                          |
| Irinotecan (UGT1A1)           | 3 (<0.01)             | 0.238        |                           |                          |
| Meloxicam (CYP2C9)            | 58,819 (5.7)          | 0.207        |                           |                          |
| Piroxicam (CYP2C9)            | 1,882 (0.2)           | 0.186        |                           |                          |
| Amikacin (MT-RNR1)            | 12 (<0.01)            | 0.126        |                           |                          |
| Tobramycin (MT-RNR1)          | 17 (<0.01)            | 0.112        |                           |                          |
| Fluorouracil (DPYD)           | 61 (<0.01)            | 0.098        |                           |                          |
| Flurbiprofen (CYP2C9)         | 1,014 (0.1)           | 0.090        |                           |                          |
| <i>Tramadol (CYP2D6)</i>      | <i>6,123 (0.6)</i>    | <i>0.089</i> |                           |                          |
| <i>Streptomycin (MT-RNR1)</i> | <i>2 (&lt;0.01)</i>   | <i>0.070</i> |                           |                          |
| <i>Ibuprofen (CYP2C9)</i>     | <i>140,020 (13.5)</i> | <i>0.063</i> |                           |                          |
| <i>Thioguanine (TPMT)</i>     | <i>5 (&lt;0.01)</i>   | <i>0.035</i> |                           |                          |
| <i>Ondansetron (CYP2D6)</i>   | <i>81,201 (7.8)</i>   | <i>0.029</i> |                           |                          |

| CPIC Level A (N=487,800) |                       |              | CPIC Level A/B (N=21,059) | CPIC Level B (N=258,994) |
|--------------------------|-----------------------|--------------|---------------------------|--------------------------|
| <i>Codeine (CYP2D6)</i>  | <i>106,201 (10.3)</i> | <i>0.028</i> |                           |                          |
| Desflurane (CACNA1S)     | 0 (0)                 | --           |                           |                          |
| Fosphenytoin (CYP2C9)    | 0 (0)                 | --           |                           |                          |
| Gentamicin (MT-RNR1)     | 0 (0)                 | --           |                           |                          |
| Kanamycin (MT-RNR1)      | 0 (0)                 | --           |                           |                          |
| Sevoflurane (CACNA1S)    | 0 (0)                 | --           |                           |                          |
| Streptomycin (MT-RNR1)   | 0 (0)                 | --           |                           |                          |

<sup>a</sup> Drug-gene pairs in bold are those with the 10 highest PDCs in the study; drug-gene pairs in italics are those with the 10 lowest PDCs in the study.

<sup>b</sup> CPIC Level A indicates: “Genetic information should be used to change prescribing of [the] affected drug. Preponderance of evidence is high or moderate in favor of changing prescribing. At least one moderate or strong action (change in prescribing) [is] recommended.” CPIC Level A/B indicates: “Preliminary review indicates it is likely that the definitive CPIC level will be either A or B. Full evidence review [is] needed to assess level of evidence, but prescribing actionability is likely. Full review by expert guideline group [is needed] to assign strength of recommendation.” CPIC level B indicates: “Genetic information could be used to change prescribing of the affected drug because alternative therapies/dosing are extremely likely to be as effective and as safe as non-genetically based dosing. Preponderance of evidence is weak with little conflicting data. At least one optional action (change in prescribing) is recommended.” <sup>5</sup>
